# Supplementary material for: One Health approach for elimination of human anthrax in a tribal district of Odisha: Study protocol
Source: PubMed Central journal article supplement (PMC8158997; doi:10.1371/journal.pone.0251041), 2021-05-27
Supplement: pone.0251041.s001.pdf [file pone.0251041.s001.pdf]

## S1 Appendix. Roles and Responsibilities of Project Teams

| Team Name                             | Team members                                                                                                                                                  | Activities                                                                                                                                                |
|---------------------------------------|---------------------------------------------------------------------------------------------------------------------------------------------------------------|-----------------------------------------------------------------------------------------------------------------------------------------------------------|
| Project Management Team               | PI, Co-PIs, External Expert Advisor                                                                                                                           | Formation of study teams.<br>Carrying out the IEC/BCC campaign.<br>Finalization of training calendar.<br>Calendar of MDC meetings.<br>Risk Zoning.        |
| Monitoring and Evaluation Team        | Scientist-C (Public Health), Research Assistant, External Expert (Veterinary), External Expert (Health System)                                                | Conducting quality monitoring of other team's activities.<br>Development of evaluation reports.                                                           |
| Technical Advisory Team               | PI, Co-PIs, Domain Experts (1 Veterinarian, 1 Physician, 1 Public health specialist, 1 Microbiologist), Scientist-B (Public Health) Scientist-B (Non-medical) | Development of surveillance protocols.<br>Development of SOPs.<br>Development of IEC materials.<br>Development of training & capacity building materials. |
| Capacity Building and Training Team   | Co-PIs, Research Assistant, Faculty members from partner agencies, Scientist-B (Public Health) Scientist-B (Non-medical)                                      | Development of training & capacity building materials.<br>Conduct of training.<br>Finalization of training calendar.                                      |
| Multi-Departmental Co-Ordination Team | Research Assistant, Scientist-B (Public Health) Scientist-B (Non-medical)                                                                                     | Development of SOPs.<br>Calendar of MDC meetings.<br>Conduct of MDC meetings.                                                                             |
| Integrated Surveillance Team          | Co-PI, Research Assistant, Field Investigators, Data Entry Operators, External experts from Bio-surveillance and Public Health surveillance.                  | Development of surveillance protocols.<br>Testing and implementing a surveillance system.                                                                 |
