# Supplementary material for: One Health approach for elimination of human anthrax in a tribal district of Odisha: Study protocol
Source: PubMed Central journal article supplement (PMC8158997; doi:10.1371/journal.pone.0251041), 2021-05-27
Supplement: pone.0251041.s005.pdf [file pone.0251041.s005.pdf]

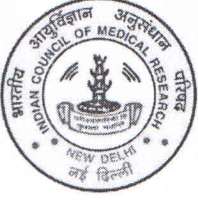

REGIONAL MEDICAL RESEARCH CENTRE (ICMR), BHUBANESWAR  
INSTITUTIONAL HUMAN ETHICS COMMITTEE

IRB No: ECR/911/Inst/OR/2017

*Protection of Human Subjects*  
*IEC Certification/ Declaration of Exemption*

1. Request Type

- Original  
 Continuation  
 Exemption

2. Type of Programme

- Research  Contract Research  Collaborative  
 Institutional Activity - Out Patient Care/ Surveillance/ Referral &  
Outbreak Investigation  Fellowship  Others

2. Proposal Identification No.

- Institutional ID :
- Funding Agency & ID (If any) :

3. Title of Research or Activity: **"One Health" strategy for elimination of human anthrax from an endemic district of Odisha: a demonstration project**

4. Principal Investigator : **Dr. Sanghamitra Pati, Director**

5. Key Personnel at RMRC Bhubaneswar & Role: **Dr S Pati, Director.**

6. Certification of IRB review

This activity/ proposal has been reviewed and approved by the IEC in accordance with the Indian Council for Medical Research (ICMR), guidelines and other GCP recommendations, by full IRB review or expedited review on **02/03/2019** [DD/MM/YYYY].

7. Remarks (If any) :

- Confidentially to be maintained
- Consent to be obtained

8. This activity/ proposal has been scrutinized and declared for exemption for review by IEC as there is less than minimal risk and no linked identifiers.

**Dr. Prakash Kumar Sahoo**  
**Scientist- C, Member Secretary**

Signature:

Name & Designation of the Official

Date: **02/03/2019**

Regional Medical Research Centre (ICMR)

At- Chandrasekharapur, Po- SE Railway Complex, Bhubaneswar-751023, Odisha

Phone: 0674 – 2305603 Website: www.rmrcbbsr.gov.in
