# Supplementary material for: One Health approach for elimination of human anthrax in a tribal district of Odisha: Study protocol
Source: PubMed Central journal article supplement (PMC8158997; doi:10.1371/journal.pone.0251041), 2021-05-27
Supplement: pone.0251041.s008.pdf [file pone.0251041.s008.pdf]

**ICMR – REGIONAL MEDICAL RESEARCH CENTRE BHUBANESWAR**

One Health strategy for elimination of human anthrax from endemic district of Odisha: a demonstration project

**BASELINE QUESTIONNAIRE**

| <b>Socio-Demographic Characteristics</b> |                                                                                                                                       |                                                                                                                                                        |  |
|------------------------------------------|---------------------------------------------------------------------------------------------------------------------------------------|--------------------------------------------------------------------------------------------------------------------------------------------------------|--|
| Q1                                       | Name of Interviewer-                                                                                                                  |                                                                                                                                                        |  |
| Q2                                       | Name of Interviewee-                                                                                                                  |                                                                                                                                                        |  |
| Q3                                       | Date/Time:                                                                                                                            |                                                                                                                                                        |  |
| Q4                                       | Age:                                                                                                                                  |                                                                                                                                                        |  |
| Q5                                       | Gender:                                                                                                                               | 1. Male<br>2. Female<br>3. Others                                                                                                                      |  |
| Q6                                       | Block:                                                                                                                                |                                                                                                                                                        |  |
| Q7                                       | Town /Village:                                                                                                                        |                                                                                                                                                        |  |
| Q8                                       | GIS:                                                                                                                                  |                                                                                                                                                        |  |
| Q9                                       | Marital status:                                                                                                                       | 1. Single<br>2. Married<br>3. Divorced<br>4. Widowed<br>5. Separated                                                                                   |  |
| Q10                                      | No. of members in family:                                                                                                             | -----                                                                                                                                                  |  |
| Q11                                      | Type of family:                                                                                                                       | 1. Joint<br>2. Nuclear                                                                                                                                 |  |
| Q12                                      | Religion:<br><i>INTERVIEWER: allow the respondent to reply without reading categories. Clarify as needed. Only one option allowed</i> | 1. Hindu;<br>2. Muslim;<br>3. Christian;<br>4. Sikh;<br>5. Others(specify)                                                                             |  |
| Q13                                      | Caste:                                                                                                                                | 1. SC<br>2. ST<br>3. OBC<br>4. General                                                                                                                 |  |
| Q14                                      | Educational qualification:                                                                                                            | Years of schooling-----                                                                                                                                |  |
| Q15                                      | Occupation:                                                                                                                           | 1. Unemployed<br>2. Government Service<br>3. Private Service<br>4. Housewife<br>5. Agriculture<br>6. Business<br>7. Daily labor<br>8. Others (Specify) |  |
| Q16                                      | What is the annual income of family?                                                                                                  | Income in Rs.-----                                                                                                                                     |  |

| <b>Information on domestic animal</b> |                        |                 |                                  |
|---------------------------------------|------------------------|-----------------|----------------------------------|
| Q17                                   | Do you keep livestock? | 1. Yes<br>2. No | <i>(If NO, then skip to Q48)</i> |

|     |                                                                         |                                                                                                                                                                                                                                                                                                                                                                              |  |
|-----|-------------------------------------------------------------------------|------------------------------------------------------------------------------------------------------------------------------------------------------------------------------------------------------------------------------------------------------------------------------------------------------------------------------------------------------------------------------|--|
| Q18 | Who deals with the livestock?                                           | <ol style="list-style-type: none"> <li>1. Myself</li> <li>2. Wife/husband</li> <li>3. Son</li> <li>4. Daughter</li> <li>5. Son-in-law</li> <li>6. Daughter-in-law</li> <li>7. Grandchild</li> <li>8. Parent</li> <li>9. Parent-in-law</li> <li>10. Brother</li> <li>11. Sister</li> <li>12. Brother-in-law</li> <li>13. Sister-in-law</li> <li>14. Other relative</li> </ol> |  |
| Q19 | Which livestock do you have?                                            | <ol style="list-style-type: none"> <li>1. Cow/Buffalo</li> <li>2. Goat</li> <li>3. Pig</li> <li>4. Sheep</li> <li>5. Other(specify)</li> </ol>                                                                                                                                                                                                                               |  |
| Q20 | What is the purpose for keeping livestock?                              | <ol style="list-style-type: none"> <li>1. Leather industry</li> <li>2. Wool</li> <li>3. Skinning</li> <li>4. Dairy</li> <li>5. Farming</li> <li>6. Selling meat</li> <li>7. Others (Specify)</li> </ol>                                                                                                                                                                      |  |
| Q21 | Where do you keep your livestock at your residence?                     | <ol style="list-style-type: none"> <li>1. Separate animal shed</li> <li>2. Inside the house</li> <li>3. Other (specify)</li> </ol>                                                                                                                                                                                                                                           |  |
| Q22 | Where do you take the livestock for grazing?                            | <ol style="list-style-type: none"> <li>1. Forest</li> <li>2. Agricultural land</li> <li>3. Grass field</li> <li>4. Buy Commercial fodder</li> <li>5. Others(specify)</li> </ol>                                                                                                                                                                                              |  |
| Q23 | How many times do you take them for grazing in a day?                   | <ol style="list-style-type: none"> <li>1. Once</li> <li>2. Twice</li> <li>3. Thrice</li> <li>4. Other (Specify)</li> </ol>                                                                                                                                                                                                                                                   |  |
| Q24 | How do you dispose the solid & animal waste products?                   | <ol style="list-style-type: none"> <li>1. Dispose in water bodies</li> <li>2. Residing place</li> <li>3. Dig a pit</li> <li>4. Throw anywhere</li> <li>5. Common pit</li> <li>6. Others(specify)</li> </ol>                                                                                                                                                                  |  |
| Q25 | How many years of experience do you have of handling livestock animals? | <ol style="list-style-type: none"> <li>1. Less than one year</li> <li>2. 1-5 years</li> <li>3. 5-10 years</li> <li>4. More than 10 years</li> </ol>                                                                                                                                                                                                                          |  |

### Vaccination

|     |                                                            |                                                                                                                  |                                  |
|-----|------------------------------------------------------------|------------------------------------------------------------------------------------------------------------------|----------------------------------|
| Q26 | Are you aware of vaccination of livestock?                 | <ol style="list-style-type: none"> <li>1. Yes</li> <li>2. No</li> </ol>                                          | <i>(If No, then skip to Q38)</i> |
| Q27 | Is the vaccination done as per schedule or as per disease? | <ol style="list-style-type: none"> <li>1. As per schedule</li> <li>2. As per disease</li> <li>3. Both</li> </ol> | <b>If 2 then skip to Q38</b>     |

|     |                                                                      |                                                                                                                                                         |                                   |
|-----|----------------------------------------------------------------------|---------------------------------------------------------------------------------------------------------------------------------------------------------|-----------------------------------|
| Q28 | Have you ever vaccinated your livestock animals?                     | 1. Yes<br>2. No                                                                                                                                         | <i>(If No, then skip to Q38)</i>  |
| Q29 | Which animals are vaccinated?                                        | 1. Cow/Buffalo<br>2. Goat<br>3. Pig<br>4. Sheep<br>5. Other(specify)                                                                                    |                                   |
| Q30 | Do you want your animals to be vaccinated?                           | 1. Yes<br>2. No                                                                                                                                         | <i>(If No, then skip to Q32)</i>  |
| Q31 | If <b>Yes</b> , then why you want the animals to be vaccinated?      | 1. To keep animals healthy/disease free<br>2. For longevity of animals<br>3. For better off springs<br>4. Others (Specify)                              |                                   |
| Q32 | If <b>No</b> , then why don't you want the animals to be vaccinated? | 1. Productivity of animals will be hampered<br>2. Vaccination is costly<br>3. Veterinary doctor/ LI inspector is not coming home<br>4. Others (Specify) |                                   |
| Q33 | If as per schedule, when did you take the animals for vaccination?   | 1. Less than 6 months<br>2. 6 months - 1 year<br>3. 1-2 years<br>4. More than 2 years                                                                   |                                   |
| Q34 | Where do you take the animals for vaccination?                       | 1. Veterinary hospital<br>2. Home<br>3. Animal health checkup camps<br>4. Others (Specify)                                                              |                                   |
| Q35 | Who does the vaccination of animals?                                 | 1. Veterinary doctor<br>2. Livestock Inspector<br>3. Other (Specify)                                                                                    |                                   |
| Q36 | Is the vaccination free of cost?                                     | 1. Yes<br>2. No                                                                                                                                         | <i>(If Yes, then skip to Q38)</i> |
| Q37 | If <b>No</b> , then how much do you spend on vaccination per animal? | Specify------(in Rs.)                                                                                                                                   |                                   |

### Animal Handling

|     |                                                  |                                                                                                                                           |                                  |
|-----|--------------------------------------------------|-------------------------------------------------------------------------------------------------------------------------------------------|----------------------------------|
| Q38 | Any recent deaths of animals in last 2 years?    | 1. Yes<br>2. No                                                                                                                           | <i>(If No, then skip to Q41)</i> |
| Q39 | If yes, then when did it occur?                  | 1. 0 - 6 months<br>2. 6 months – 1 year<br>3. 1 year – 1.5 years<br>4. 1.5 – 2 years                                                      |                                  |
| Q40 | What were the symptoms during death?             | 1. High fever<br>2. Blood from nose, mouth and anus<br>3. Breathing problems<br>4. Tremor before death<br>5. No symptoms<br>6. Don't know |                                  |
| Q41 | Do you skin dead animals?                        | 1. Yes<br>2. No                                                                                                                           | <i>(If No, then skip to Q44)</i> |
| Q42 | If yes do you wear protective equipments for it? | 1. Yes<br>2. No                                                                                                                           |                                  |
| Q43 | What protective equipments do you wear?          | 1. Face mask<br>2. Gloves<br>3. Head cover<br>4. Body wear                                                                                |                                  |

|     |                                                                                                                                   |                                                                                                                                                                                                                                                                                                  |                                                |
|-----|-----------------------------------------------------------------------------------------------------------------------------------|--------------------------------------------------------------------------------------------------------------------------------------------------------------------------------------------------------------------------------------------------------------------------------------------------|------------------------------------------------|
|     |                                                                                                                                   | 5. Others (Specify)                                                                                                                                                                                                                                                                              |                                                |
| Q44 | What do you do with the dead bodies of animal/ livestock?                                                                         | <ol style="list-style-type: none"> <li>1. Burial</li> <li>2. Throw them away</li> <li>3. Distribute among villagers</li> <li>4. Selling the carcass</li> <li>5. Report to closest veterinary office</li> <li>6. Incineration</li> <li>7. Consume the meat</li> <li>8. Others(specify)</li> </ol> |                                                |
| Q45 | Do you know about getting financial help from the Govt. for burial of animals?<br><br><i>If yes, then move to next questions.</i> | <ol style="list-style-type: none"> <li>1. Yes</li> <li>2. No</li> <li>3. Don't know</li> </ol>                                                                                                                                                                                                   | <i>(If No or Don't Know, then move to Q48)</i> |
| Q46 | Do you think compensation amount is enough for reporting the suspected dead animal?                                               | <ol style="list-style-type: none"> <li>1. Yes</li> <li>2. No</li> <li>3. Don't know</li> </ol>                                                                                                                                                                                                   |                                                |
| Q47 | Have you ever received compensation for reporting anthrax cases to the relevant authority?                                        | <ol style="list-style-type: none"> <li>1. Yes</li> <li>2. No</li> <li>3. Don't know</li> </ol>                                                                                                                                                                                                   |                                                |

### Food Habits

|     |                                                                |                                                                                                                                                                     |                                  |
|-----|----------------------------------------------------------------|---------------------------------------------------------------------------------------------------------------------------------------------------------------------|----------------------------------|
| Q48 | Do you consume meat?                                           | <ol style="list-style-type: none"> <li>1. Yes</li> <li>2. No</li> </ol>                                                                                             | <i>(If No, then skip to Q57)</i> |
| Q49 | What type of meat do you consume?                              | <ol style="list-style-type: none"> <li>1. Beef</li> <li>2. Pig</li> <li>3. Goat</li> <li>4. Sheep</li> <li>5. Others (Specify)</li> </ol>                           |                                  |
| Q50 | What is the source of meat?                                    | <ol style="list-style-type: none"> <li>1. Market</li> <li>2. Hunting</li> <li>3. Livestock animals</li> <li>4. Dead animals</li> <li>5. Others (Specify)</li> </ol> |                                  |
| Q51 | How do you consume the meat?                                   | <ol style="list-style-type: none"> <li>1. Cooked</li> <li>2. Roasted</li> <li>3. Raw</li> <li>4. Dried</li> <li>5. Others(specify)</li> </ol>                       |                                  |
| Q52 | How often do you consume the meat?                             | <ol style="list-style-type: none"> <li>1. Once in a week</li> <li>2. Twice in week</li> <li>3. Occasionally</li> <li>4. Daily</li> </ol>                            |                                  |
| Q53 | Do you preserve your meat?                                     | <ol style="list-style-type: none"> <li>1. Yes</li> <li>2. No</li> </ol>                                                                                             | <i>(If No, then skip to Q55)</i> |
| Q54 | If yes, how do you preserve your meat? (Explain by respondent) | <ol style="list-style-type: none"> <li>1. Refrigerate</li> <li>2. Keep in water</li> <li>3. Dried</li> <li>4. Any traditional methods</li> </ol>                    |                                  |
| Q55 | Do you take animal blood?                                      | <ol style="list-style-type: none"> <li>1. Yes</li> <li>2. No</li> </ol>                                                                                             | <i>(If No, then skip to Q57)</i> |
| Q56 | If yes, how do you consume?                                    | <ol style="list-style-type: none"> <li>1. Cooked</li> <li>2. Dried</li> <li>3. Raw</li> <li>4. Others(specify)</li> </ol>                                           |                                  |

| <b>Knowledge assessment &amp; awareness of the respondent about anthrax</b> |                                                           |                                                                                                                                                                                                                                                                                         |                                                                                                    |
|-----------------------------------------------------------------------------|-----------------------------------------------------------|-----------------------------------------------------------------------------------------------------------------------------------------------------------------------------------------------------------------------------------------------------------------------------------------|----------------------------------------------------------------------------------------------------|
| Q57                                                                         | Have you ever heard about anthrax?                        | <ol style="list-style-type: none"> <li>1. Yes</li> <li>2. No</li> </ol>                                                                                                                                                                                                                 | <i>(If No, then go to the end)</i>                                                                 |
| Q58                                                                         | If yes, from where did you come to know about anthrax?    | <ol style="list-style-type: none"> <li>1. Newspaper</li> <li>2. Doctor</li> <li>3. ANM/AWW/ASHA</li> <li>4. Community</li> <li>5. Forest Department</li> <li>6. Veterinary Department</li> <li>7. Others(specify)</li> </ol>                                                            |                                                                                                    |
| Q59                                                                         | Do you have any local names for anthrax?                  | <b>VERTBATIUM ()</b>                                                                                                                                                                                                                                                                    |                                                                                                    |
| Q60                                                                         | Who all are affected by anthrax?                          | <ol style="list-style-type: none"> <li>1. Human</li> <li>2. Livestock</li> <li>3. Both</li> <li>4. None</li> <li>5. Don't Know</li> </ol>                                                                                                                                               |                                                                                                    |
| Q61                                                                         | Do you know how anthrax is transmitted?                   | <ol style="list-style-type: none"> <li>1. Yes</li> <li>2. No</li> <li>3. Don't know</li> </ol>                                                                                                                                                                                          | <i>(If No or Don't Know, then skip to Q63)</i>                                                     |
| Q62                                                                         | If yes, how it is transmitted?                            | <ol style="list-style-type: none"> <li>1. Air</li> <li>2. Food</li> <li>3. Contact with infected animal</li> <li>4. Soil</li> <li>5. Flies and Insects</li> <li>6. All of above</li> <li>7. Don't know</li> <li>8. Others</li> </ol>                                                    |                                                                                                    |
| Q63                                                                         | What are the symptoms of anthrax in animals?              | <ol style="list-style-type: none"> <li>1. High fever</li> <li>2. Blood from nose, mouth and anus</li> <li>3. Breathing problems</li> <li>4. Tremor before death</li> <li>5. Don't know</li> <li>6. Others (Specify)</li> </ol>                                                          |                                                                                                    |
| Q64                                                                         | How do you respond to anthrax suspected cases in animals? | <ol style="list-style-type: none"> <li>1. None</li> <li>2. Inform relevant authority</li> <li>3. Disinfect the infected areas</li> <li>4. Treat with antibiotic</li> <li>5. Traditional methods</li> <li>6. Wait and see</li> <li>7. Others (Specify)</li> </ol>                        |                                                                                                    |
| Q65                                                                         | If you inform, then whom do you do?                       | <ol style="list-style-type: none"> <li>1. ASHA/ANM</li> <li>2. Livestock officials</li> <li>3. Forest Department Officials</li> <li>4. PRI members</li> <li>5. Teachers/Headmaster</li> <li>6. Unskilled health workers</li> </ol>                                                      |                                                                                                    |
| Q66                                                                         | How do you handle animals dead due to anthrax?            | <ol style="list-style-type: none"> <li>1. Throw them away</li> <li>2. Consume the meat</li> <li>3. Burying</li> <li>4. Burning</li> <li>5. Both burning and burying</li> <li>6. Inform health officials</li> <li>7. Inform veterinary officials</li> <li>8. Others (Specify)</li> </ol> | <b>If 1 then skip to Q67, If 2 then skip to Q68, If 3 then skip to Q69, If 4 then skip to Q70.</b> |

|     |                                                                         |                                                                                                                                                                                                                                                                                                                                                |                                    |
|-----|-------------------------------------------------------------------------|------------------------------------------------------------------------------------------------------------------------------------------------------------------------------------------------------------------------------------------------------------------------------------------------------------------------------------------------|------------------------------------|
| Q67 | If you throw the animals, then where do you do?                         | <ol style="list-style-type: none"> <li>1. Forest</li> <li>2. Agricultural fields</li> <li>3. Nearby house</li> <li>4. Outside village</li> <li>5. Drainage system</li> <li>6. Water bodies</li> <li>7. Others (Specify)</li> </ol>                                                                                                             |                                    |
| Q68 | If you consume the meat, then which part of animal body do you consume? | <b>VERTBATIUM ()</b>                                                                                                                                                                                                                                                                                                                           |                                    |
| Q69 | If you bury the animals, then where do you do?                          | <ol style="list-style-type: none"> <li>1. Forest</li> <li>2. Agricultural fields</li> <li>3. Nearby house</li> <li>4. Outside village</li> <li>5. Others (Specify)</li> </ol>                                                                                                                                                                  |                                    |
| Q70 | If you burn the animals, then where do you do?                          | <ol style="list-style-type: none"> <li>1. Forest</li> <li>2. Agricultural fields</li> <li>3. Nearby house</li> <li>4. Outside village</li> <li>5. Others (Specify)</li> </ol>                                                                                                                                                                  |                                    |
| Q71 | Have you heard about anthrax cases in animals in last two years?        | <ol style="list-style-type: none"> <li>1. Yes</li> <li>2. No</li> </ol>                                                                                                                                                                                                                                                                        | <i>(If No, then skip to Q74)</i>   |
| Q72 | If yes, then when did it happen?                                        | <ol style="list-style-type: none"> <li>1. 0 - 6 months</li> <li>2. 6 months – 1 year</li> <li>3. 1 year – 1.5 years</li> <li>4. 1.5 years – 2 years</li> </ol>                                                                                                                                                                                 |                                    |
| Q73 | How many cases were there in last two years?                            | <b>VERTBATIUM ()</b>                                                                                                                                                                                                                                                                                                                           |                                    |
| Q74 | Has any livestock of yours suffered from anthrax?                       | <ol style="list-style-type: none"> <li>1. Yes</li> <li>2. No</li> <li>3. Don't Know</li> </ol>                                                                                                                                                                                                                                                 |                                    |
| Q75 | Is there any activities conducted on anthrax by veterinary department?  | <ol style="list-style-type: none"> <li>1. Yes</li> <li>2. No</li> <li>3. Don't Know</li> </ol>                                                                                                                                                                                                                                                 |                                    |
| Q76 | If yes, specify.                                                        | <b>VERTBATIUM()</b>                                                                                                                                                                                                                                                                                                                            |                                    |
| Q77 | Are you aware about anthrax in humans?                                  | <ol style="list-style-type: none"> <li>1. Yes</li> <li>2. No</li> </ol>                                                                                                                                                                                                                                                                        | <i>(If No, then go to the end)</i> |
| Q78 | How do you think people get infected with anthrax?                      | <ol style="list-style-type: none"> <li>1. Contact with infected livestock</li> <li>2. Consumption of meat from infected animal</li> <li>3. Consumption of other products from infected animal</li> <li>4. Contact with wild animals</li> <li>5. Slaughtering an infected carcass</li> <li>6. Don't know</li> <li>7. Others(Specify)</li> </ol> |                                    |
| Q79 | What are the symptoms of anthrax in humans?                             | <ol style="list-style-type: none"> <li>1. Abdominal pain</li> <li>2. Swollen neck</li> <li>3. Bleeding from all openings</li> <li>4. Ulcers of skin</li> <li>5. Others(specify)</li> <li>6. Don't know</li> </ol>                                                                                                                              |                                    |

**Confidential – For Research Propose Only**

|     |                                                                    |                                                                                            |                                  |
|-----|--------------------------------------------------------------------|--------------------------------------------------------------------------------------------|----------------------------------|
| Q80 | Have you heard about anthrax cases in humans in last two years?    | 1. Yes<br>2. No<br>3. Don't know                                                           | <i>(If No, then skip to Q83)</i> |
| Q81 | If yes, then when did it happen?                                   | 5. 0 - 6 months<br>6. 6 months – 1 year<br>7. 1 year – 1.5 years<br>8. 1.5 years – 2 years |                                  |
| Q82 | How many cases were there in last one year?                        | <b>VERTBATIUM()</b>                                                                        |                                  |
| Q83 | Has any member of your family suffered from anthrax?               | 4. Yes<br>5. No<br>6. Don't Know                                                           |                                  |
| Q84 | Is there any activities conducted on anthrax by health department? | 1. Yes<br>2. No<br>3. Don't Know                                                           |                                  |
| Q85 | If yes, specify.                                                   | <b>VERTBATIUM()</b>                                                                        |                                  |
